# Supplementary material
Source: publisher site journal article supplement (https://www.dovepress.com/article/537644)
Supplement: Supplementary file 1 [file Supplementary%20table-V2.0.pdf]

**Supplementary Table 1: The Pre-Treatment Baseline Assessment for the Five Children with Fabry Disease**

|                                  | <b>Case 1</b>                                                | <b>Case 2</b>                                                                      | <b>Case 3</b> | <b>Case 4</b>    | <b>Case 5</b> |              |
|----------------------------------|--------------------------------------------------------------|------------------------------------------------------------------------------------|---------------|------------------|---------------|--------------|
| <b>Age at Assessment (years)</b> | 13.9                                                         | 10.6                                                                               | 12.6          | 10.7             | 11.2          |              |
| <b>Physical Examination</b>      | <b>Weight (kg)</b>                                           | 38.4                                                                               | 22.5          | 26               | 26.5          | 77           |
|                                  | <b>Weight Percentile<sup>1</sup></b>                         | P3-P10                                                                             | <P3           | <P3              | P3-P10        | >P97         |
|                                  | <b>Height (cm)</b>                                           | 155                                                                                | 130           | 142              | 136           | 163          |
|                                  | <b>Height Percentile<sup>1</sup></b>                         | P3-P10                                                                             | <P3           | P3-P10           | P3-P10        | >P97         |
|                                  | <b>BMI (kg/m<sup>2</sup>)</b>                                | 15.9                                                                               | 13.3          | 12.9             | 14.3          | 29.0         |
| <b>Kidney</b>                    | <b>Urine Protein</b>                                         | Negative                                                                           | Negative      | Trace protein    | Negative      | Negative     |
|                                  | <b>Urine Red Blood Cells (cells/HP)</b>                      | Normal                                                                             | Normal        | Normal           | Normal        | Normal       |
|                                  | <b>Blood Urea Nitrogen (mmol/L)</b>                          | 4.25                                                                               | 5.63          | 4.02             | 7.57          | 4.56         |
|                                  | <b>Serum Creatinine (umol/L)</b>                             | 51.6                                                                               | 40.3          | 28               | 44            | 43.3         |
|                                  | <b>Glomerular Filtration Rate (ml/min·1.73m<sup>2</sup>)</b> | 109.7                                                                              | 117.8         | 185.2            | 112.8         | 137.4        |
|                                  | <b>Nutcracker Phenomenon (Left Renal Vein Entrapment)</b>    | Negative                                                                           | Positive      | Positive         | Negative      | Negative     |
|                                  | <b>24-hour Urine Protein Quantification (mg)</b>             | 48.0                                                                               | 62.0          | 49.0             | 64.0          | 38.0         |
| <b>Heart</b>                     | <b>Electrocardiograph</b>                                    | Accelerated atrial arrhythmia                                                      | Sinus rhythm  | Sinus arrhythmia | Sinus rhythm  | Sinus rhythm |
|                                  | <b>Ultrasonic Cardiogram</b>                                 | Normal upper limit of left atrial diameter; Aortic sinus diameter widened slightly | Normal        | Normal           | Normal        | Normal       |

|                             |                                                                    |                                                               |                                                                                                                                                                                                                                                           |                                              |                                                                                          |                                                                                                                                                   |
|-----------------------------|--------------------------------------------------------------------|---------------------------------------------------------------|-----------------------------------------------------------------------------------------------------------------------------------------------------------------------------------------------------------------------------------------------------------|----------------------------------------------|------------------------------------------------------------------------------------------|---------------------------------------------------------------------------------------------------------------------------------------------------|
|                             | <b>Left Ventricular Mass Indexes (g/m<sup>2</sup>)<sup>2</sup></b> | 43.6                                                          | 48.9                                                                                                                                                                                                                                                      | 42.5                                         | 50.9                                                                                     | 49.1                                                                                                                                              |
| <b>Brain/Nervous System</b> | <b>Brain Magnetic Resonance Imaging</b>                            | Pineal cyst                                                   | Punctate and linear high signals are seen in the sulci of bilateral parietal, occipital, and temporal lobes on FLAIR imaging, with prominent vascular markings; The walls of the left posterior cerebral artery and its branches show slight irregularity | Focal demyelination in the left frontal lobe | Normal                                                                                   | Normal                                                                                                                                            |
|                             | <b>Transcranial Doppler</b>                                        | Pulsatility Index: 0.53-0.67                                  | Normal                                                                                                                                                                                                                                                    | Normal                                       | Normal                                                                                   | Normal                                                                                                                                            |
|                             | <b>Electromyography</b>                                            | Normal                                                        | Normal                                                                                                                                                                                                                                                    | Normal                                       | Normal                                                                                   | Normal                                                                                                                                            |
| <b>Lung</b>                 | <b>Pulmonary Function</b>                                          | Lung capacity: normal; Pulmonary ventilation function: normal | Lung capacity: normal; Pulmonary ventilation function: normal                                                                                                                                                                                             | NA                                           | Lung capacity: reduced inspiratory capacity (IC); Pulmonary ventilation function: normal | Lung capacity: reduced inspiratory capacity (IC); Pulmonary ventilation function: reduced forced expiratory flow at 75% of vital capacity (FEF75) |
| <b>Abdomen</b>              | <b>Abdominal Ultrasound</b>                                        | Normal                                                        | Normal                                                                                                                                                                                                                                                    | Normal                                       | Normal                                                                                   | Normal                                                                                                                                            |
| <b>Eyes</b>                 | <b>Fundus Examination</b>                                          | Normal                                                        | Normal                                                                                                                                                                                                                                                    | Normal                                       | Normal                                                                                   | Normal                                                                                                                                            |
| <b>Ears</b>                 | <b>Pure Tone Test</b>                                              | Pass                                                          | Pass                                                                                                                                                                                                                                                      | Mild high-frequency bilateral hearing loss   | Pass                                                                                     | Pass                                                                                                                                              |

**Note:** NA, not available. The patient experienced significant nausea and was unable to complete the examination.

**Reference ranges:** Blood urea nitrogen: 2.7-7 mmol/L; Serum creatinine: 27-66 µmol/L; 24-hour urine protein: <150 mg; Pulsatility Index: 0.7-1.1.

**References:**

<sup>1</sup>Li H, Ji CY, Zong XN, et al. Height and weight standardized growth charts for Chinese children and adolescents aged 0 to 18 years. *Zhonghua Er Ke Za Zhi*. 2009;47(7):487-92. DOI: 10.3760/cma.j.issn.0578-1310.2009.07.003

<sup>2</sup>Díaz A, Zócalo Y, Bia D. Reference Intervals and Percentile Curves of Echocardiographic Left Ventricular Mass, Relative Wall Thickness and Ejection Fraction in Healthy Children and Adolescents. *Pediatr Cardiol*. 2019;40(2):283-301. doi:10.1007/s00246-018-2000-y.
